# Supplementary material for: Synthesis and thermotropic properties of new green electrochromic ionic liquid crystals
Source: Royal Society of Chemistry journal article supplement (doi:10.1039/c9nj03303c), 2019-01-01
Supplement: c9nj03303c1.pdf [file c9nj03303c1.pdf]

## ELECTRONIC SUPPLEMENTARY INFORMATION

### Synthesis and Thermotropic Properties of New Green Electrochromic Ionic Liquid Crystals

Lucia Veltri,<sup>\*a</sup> Gabriella Cavallo,<sup>b</sup> Amerigo Beneduci,<sup>\*a</sup> Pierangelo Metrangolo,<sup>b,c</sup> Giuseppina Anna Corrente,<sup>a</sup> Maurizio Ursini,<sup>b</sup> Roberto Romeo,<sup>d</sup> Giancarlo Terraneo,<sup>b</sup> and Bartolo Gabriele<sup>\*a</sup>

#### Table of Contents

|                                   |     |
|-----------------------------------|-----|
| Copies of DSC and TGA thermograms | 2-8 |
| Figure S-15                       | 9   |

## Copies of DSC and TGA thermograms

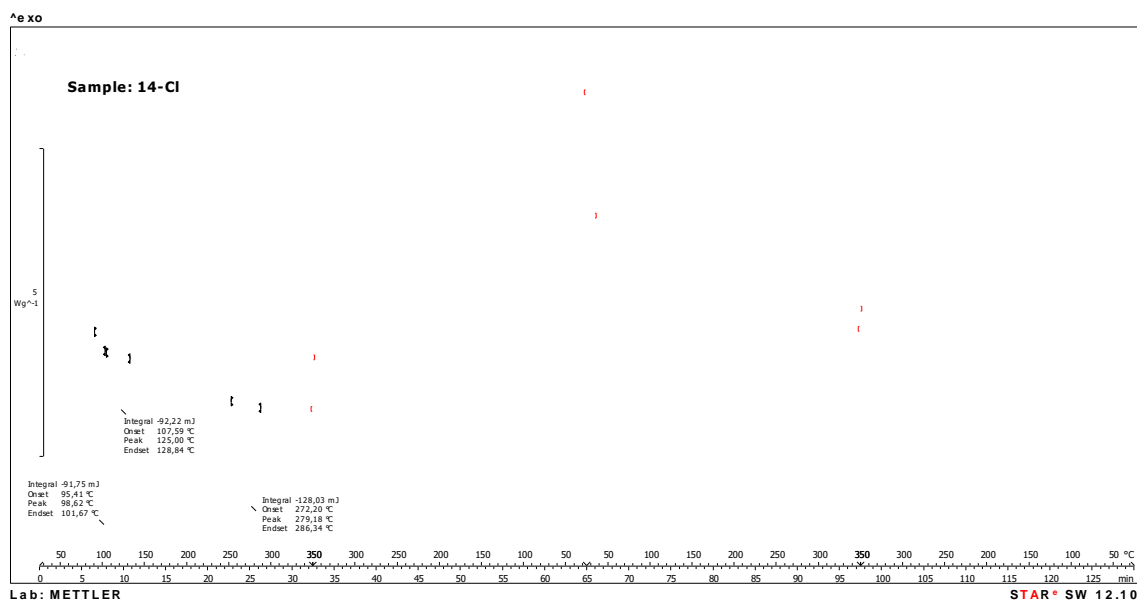

Figure S1: DSC thermogram of compound 14-Cl,

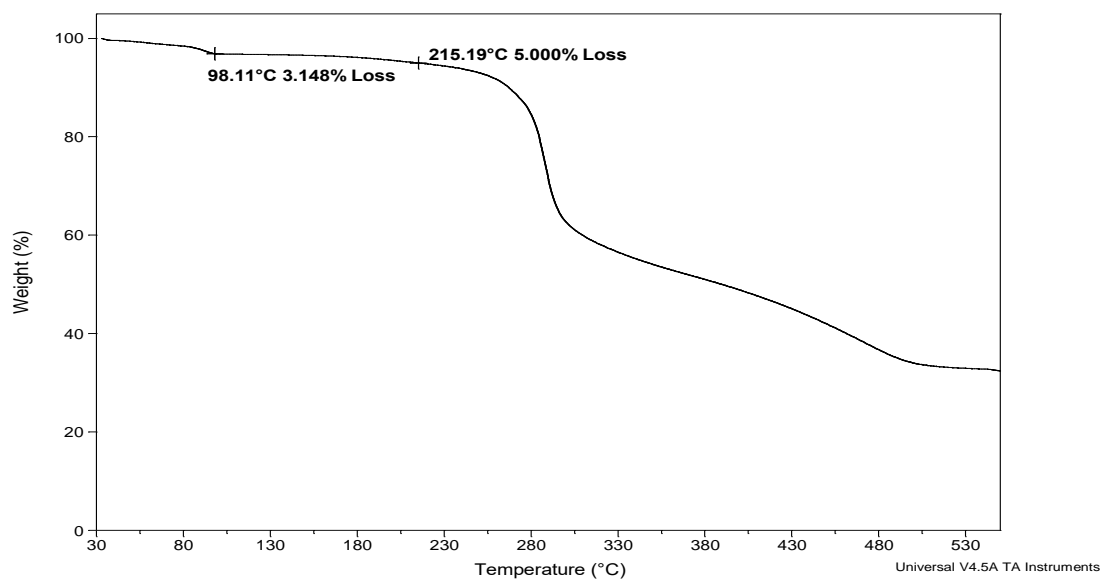

Figure S2: Thermogravimetric curve of 14-Cl.

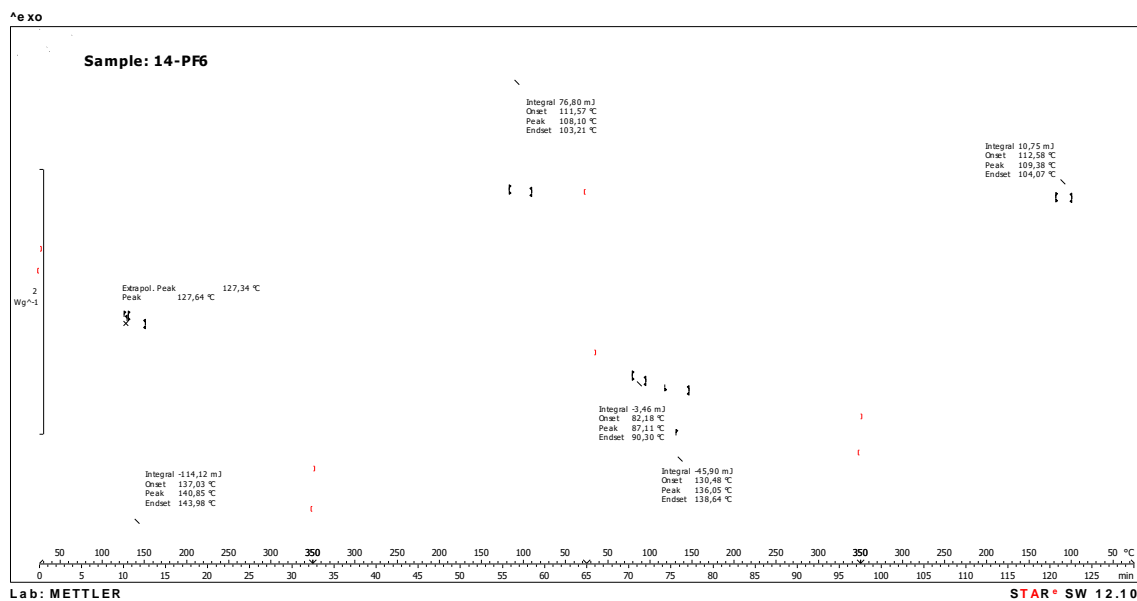

**Figure S3:** DSC thermogram of compound **14- PF<sub>6</sub>**.

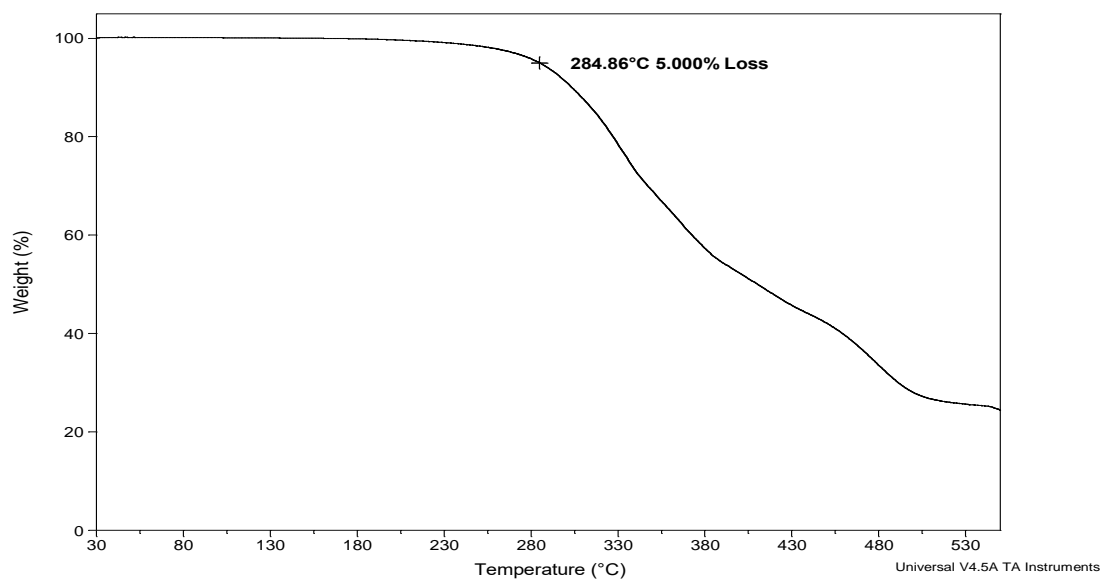

**Figure S4:** Thermogravimetric curve of **14-PF<sub>6</sub>**.

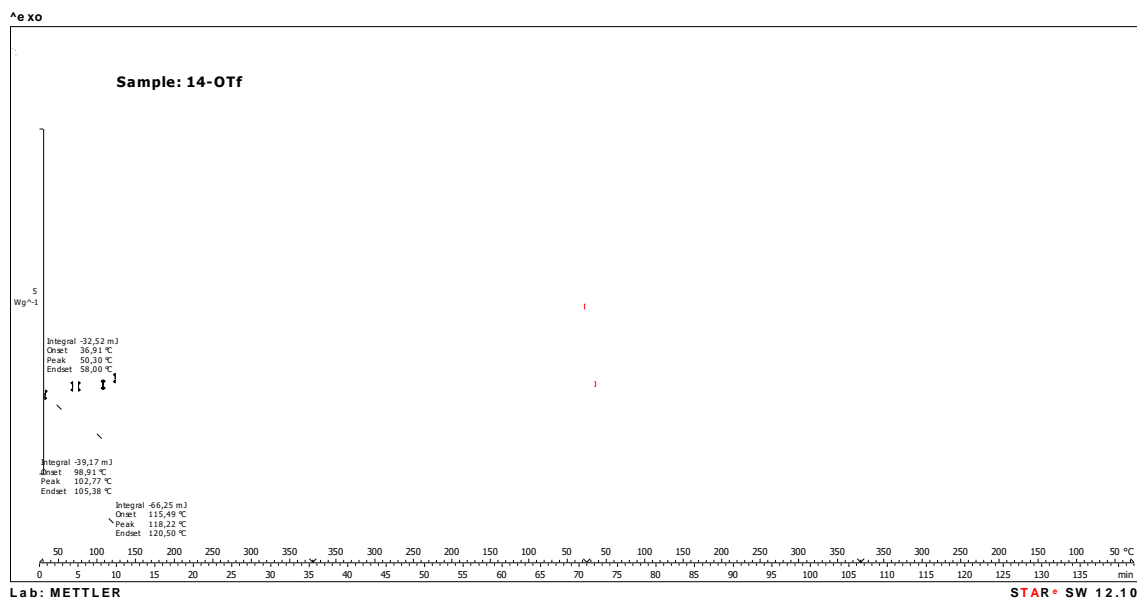

Figure S5: DSC thermogram of compound 14- OTf.

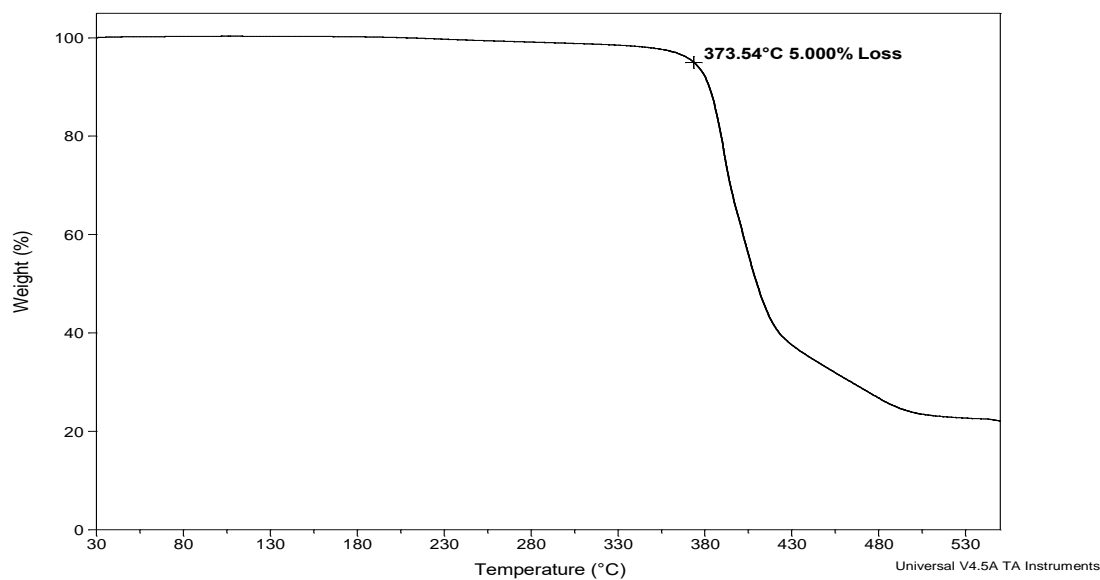

Figure S6: Thermogravimetric curve of 14-OTf.

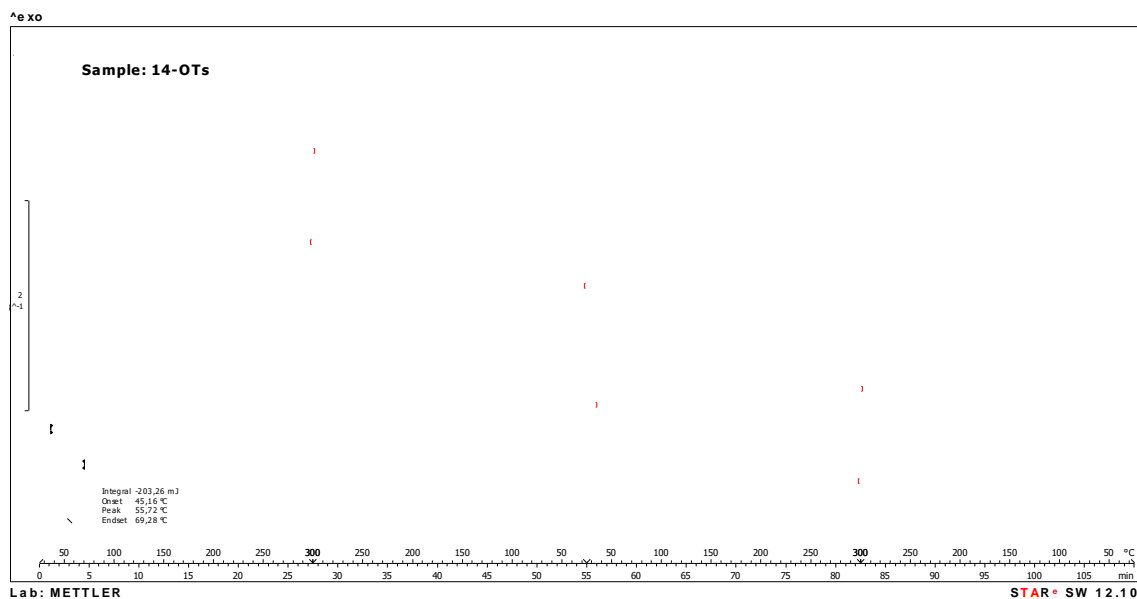

Figure S7: DSC thermogram of compound 14- OTs.

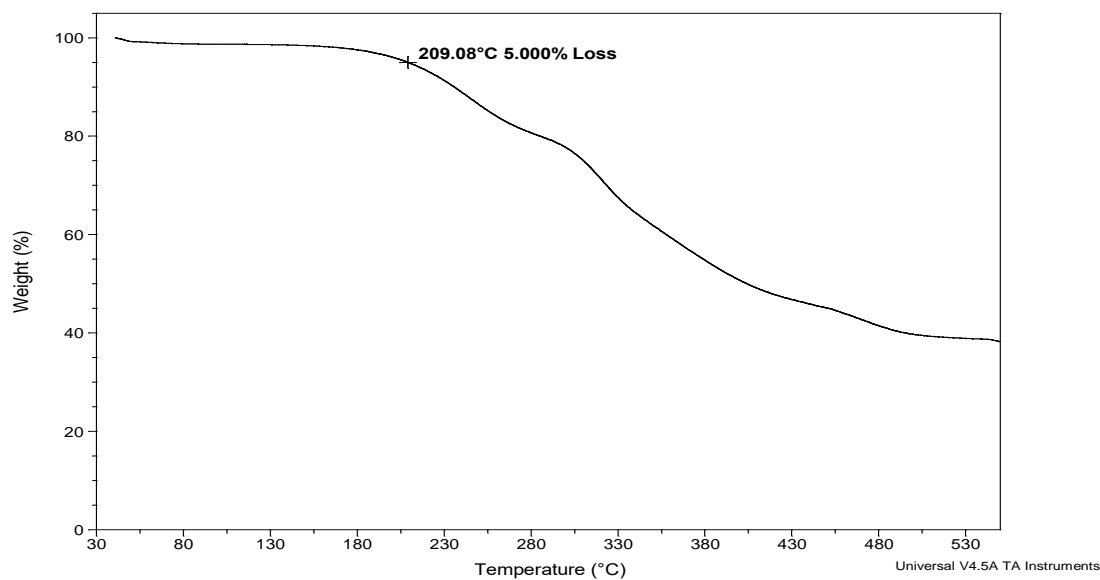

Figure S8: Thermogravimetric curve of 14-OTs.

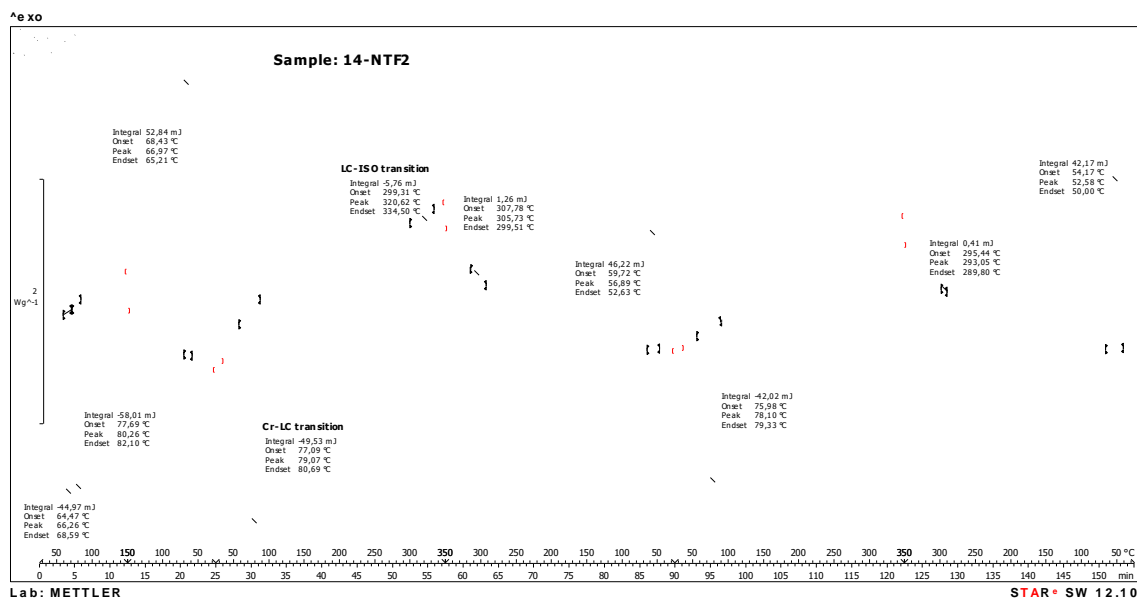

Figure S9: DSC thermogram of compound 14-NTF<sub>2</sub>.

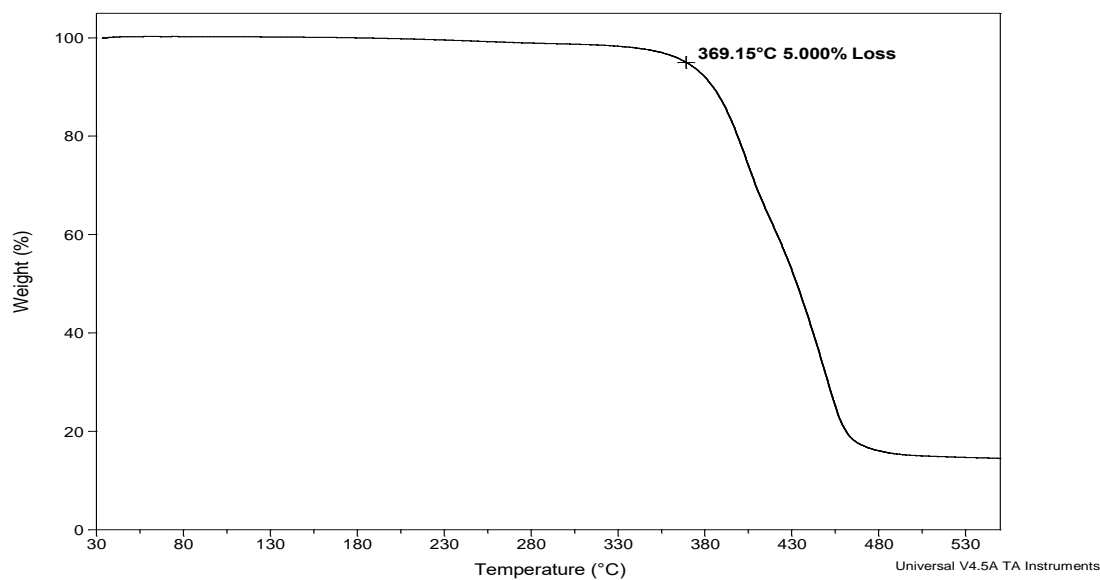

Figure S10: Thermogravimetric curve of 14-NTF<sub>2</sub>.

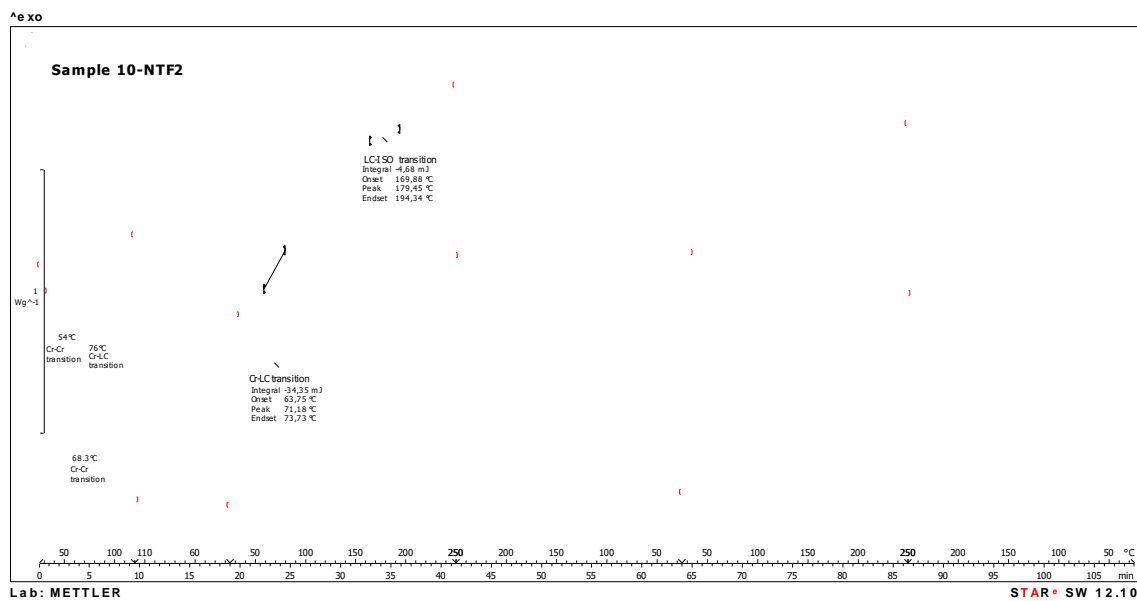

Figure S11: DSC thermogram of compound 10-NTf<sub>2</sub>.

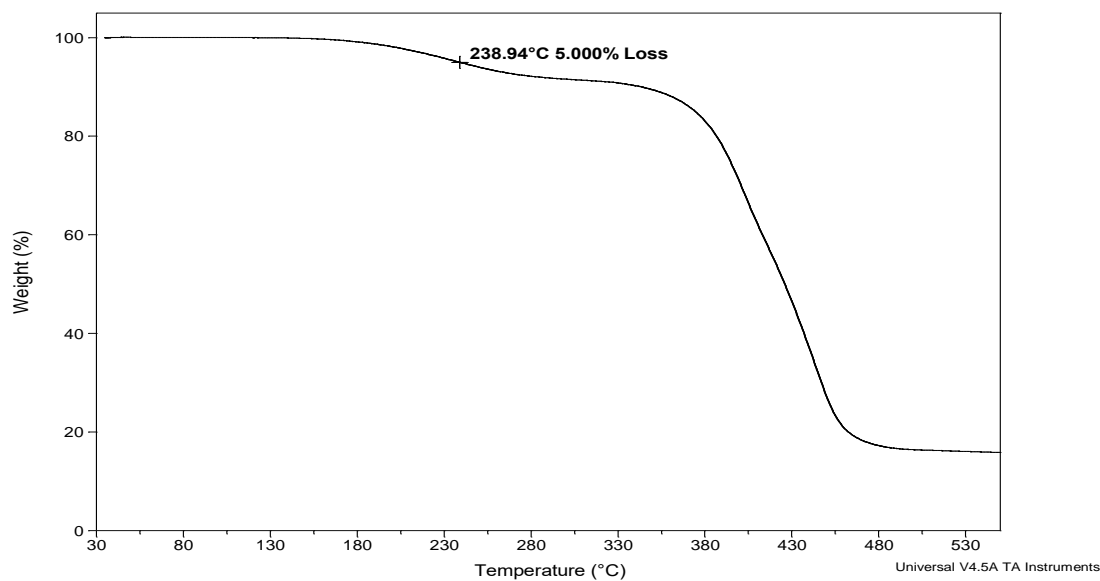

Figure S12: Thermogravimetric curve of 10-NTf<sub>2</sub>.

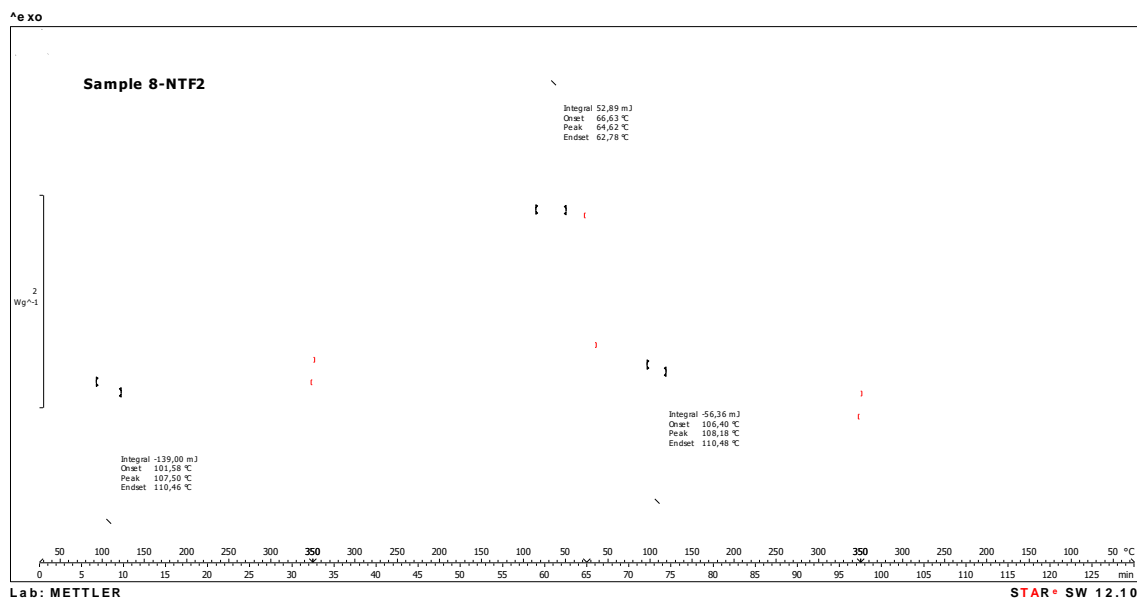

**Figure S13:** DSC thermogram of compound **8-NTF<sub>2</sub>**.

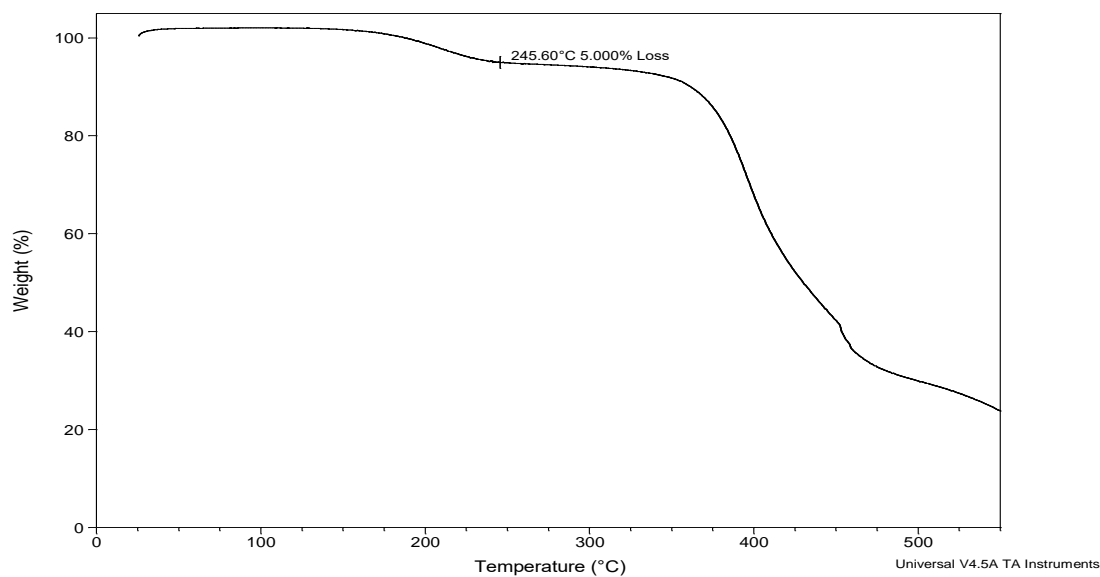

**Figure S14:** Thermogravimetric curve of **8-NTF<sub>2</sub>**.



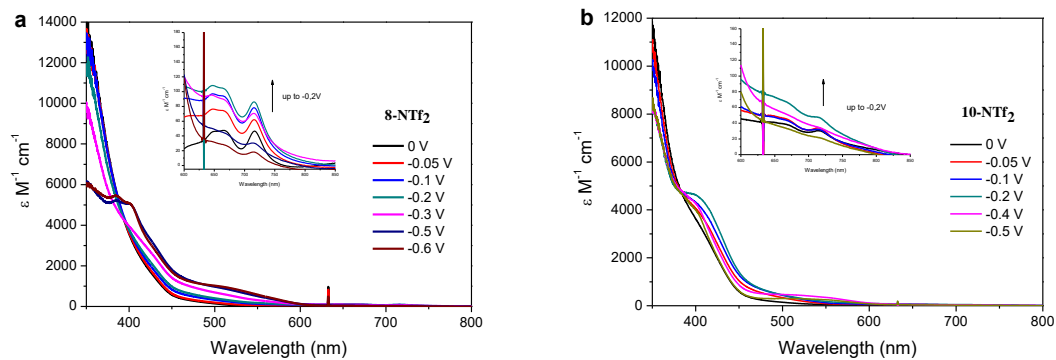

**Figure S15:** Spectroelectrochemistry of the compounds (a) **8-NTf<sub>2</sub>** and (b) **10-NTf<sub>2</sub>** with potential referred to Ag/AgCl. The insets highlight the typical viologen absorption bands hermogravimetric curve of **8-NTf<sub>2</sub>**.
